# Supplementary material for: MAP7 and MUCL1 Are Biomarkers of Vitamin D3-Induced Tolerogenic Dendritic Cells in Multiple Sclerosis Patients
Source: PubMed Central journal article supplement (PMC6598738; doi:10.3389/fimmu.2019.01251), 2019-06-19
Supplement: Table_1.pdf [file Table_1.pdf]

**SUPPLEMENTARY TABLE 1 | TaqMan Assays used for qPCR validation.**

| <b>Gene</b>    | <b>TaqMan Assay ID</b> | <b>Amplicon length (bp)</b> |
|----------------|------------------------|-----------------------------|
| <i>CA2</i>     | Hs01070108_m1          | 77                          |
| <i>CAMP</i>    | Hs00189038_m1          | 86                          |
| <i>CLEC5A</i>  | Hs00183780_m1          | 65                          |
| <i>CYP24A1</i> | Hs00167999_m1          | 123                         |
| <i>DHRS9</i>   | Hs00608375_m1          | 66                          |
| <i>GAPDH</i>   | Hs99999905_m1          | 122                         |
| <i>GZMB</i>    | Hs01554355_m1          | 134                         |
| <i>IL1R1</i>   | Hs00991002_m1          | 152                         |
| <i>MAP7</i>    | Hs01009609_m1          | 91                          |
| <i>MUCL1</i>   | Hs00536495_m1          | 86                          |
| <i>OS9</i>     | Hs00907099_g1          | 68                          |
| <i>PPIA</i>    | Hs99999904_m1          | 98                          |
| <i>SNORD30</i> | Hs03309259_s1          | 70                          |
| <i>SPARC</i>   | Hs00234160_m1          | 76                          |
| <i>ST6GAL1</i> | Hs00949382_m1          | 120                         |
| <i>TBP</i>     | Hs99999910_m1          | 127                         |
| <i>THBS1</i>   | Hs00962908_m1          | 59                          |
